# Supplementary material for: Kir2.1-mediated membrane potential promotes nutrient acquisition and inflammation through regulation of nutrient transporters
Source: PubMed Central journal article supplement (PMC9213538; doi:10.1038/s41467-022-31149-y), 2022-06-21
Supplement: 41467_2022_31149_MOESM1_ESM.pdf [file 41467_2022_31149_MOESM1_ESM.pdf]

**Kir2.1-mediated membrane potential is a critical determinant of  
nutrient acquisition feeding inflammation**

**Supplementary information**

**a**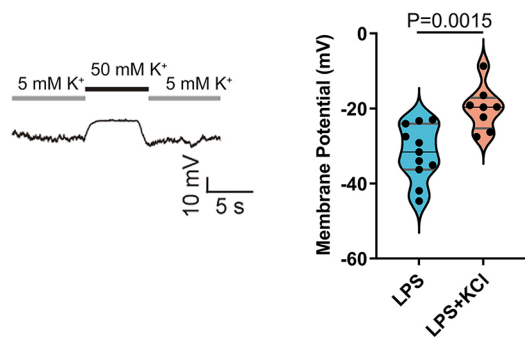**b**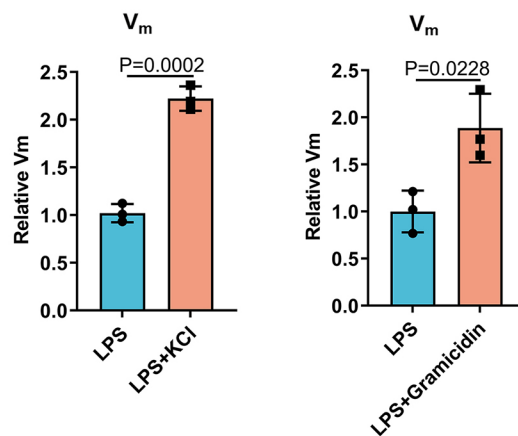**c**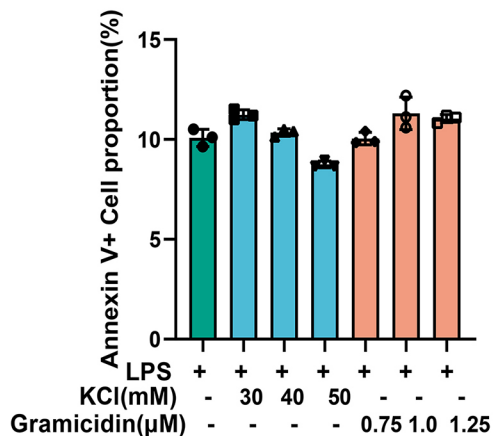**d**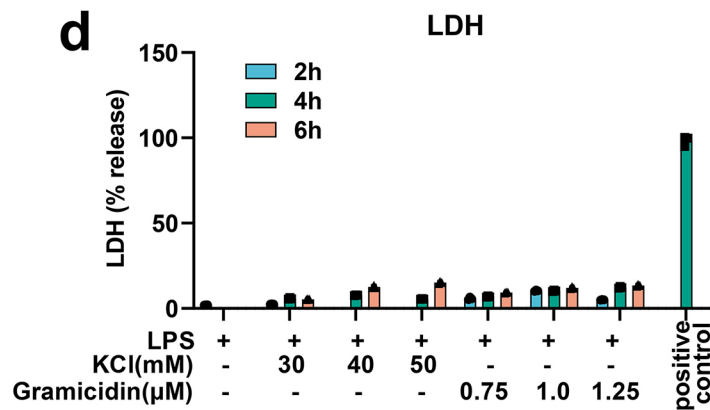**e**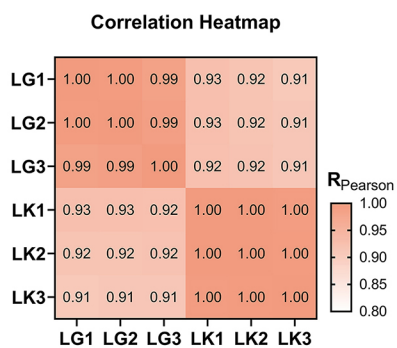**f**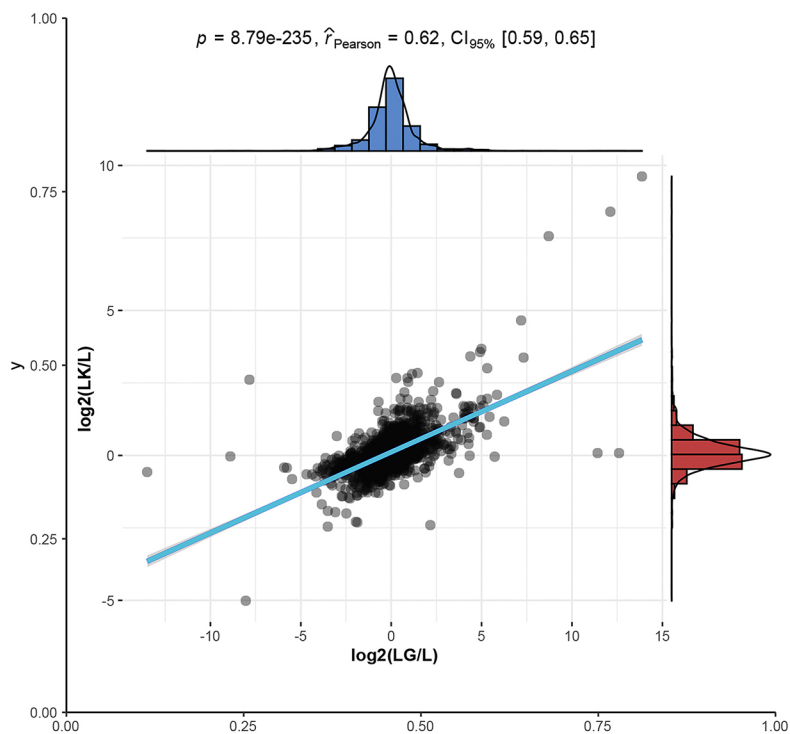**g**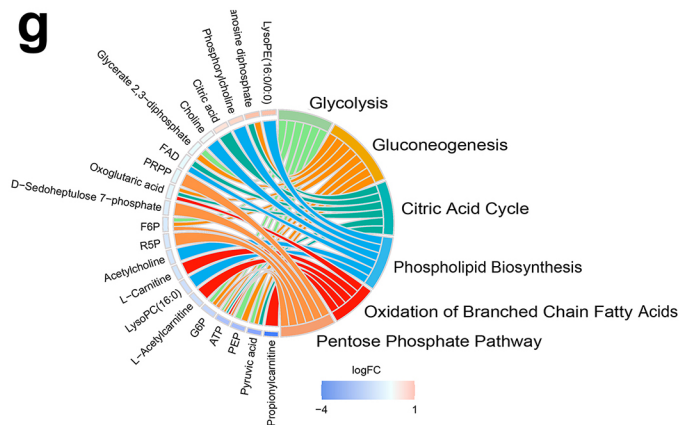

### **Supplementary Figure 1. Macrophage $V_m$ is essential for nutrient acquisition to fuel inflammation**

(a and b)  $V_m$  measurement by patch clamp (a) and the  $V_m$ -sensitive fluorochrome DiBAC4(3) (b) (a,  $n=11$  and  $8$ ; b,  $n=3$ ; mean  $\pm$  SD).

(c) Apoptosis analysis of mouse peritoneal macrophages treated with 500 ng/ml LPS in the presence or absence of different concentrations of elevated  $[K^+]_e$  and gramicidin for 6 h followed by annexin V and PI staining ( $n=3$ , mean  $\pm$  SD). Representative of three independent experiments.

(d) LDH in the culture medium of mouse peritoneal macrophages treated with 500 ng/ml LPS in the presence or absence of different concentrations of elevated  $[K^+]_e$  and gramicidin for different times ( $n=3$ , mean  $\pm$  SD). Representative of three independent experiments.

(e) Correlation heatmap of the LK group (50 mM elevated  $[K^+]_e$ ) and the LG group (LPS plus gramicidin) in the transcriptome.

(f) Correlation analysis of the LK (50 mM elevated  $[K^+]_e$ ) and LG groups (LPS plus gramicidin) in the metabolome.

(g) Chord diagram showing pathway and metabolite enrichment analysis in the highlighted cluster with MetaboAnalyst 5.0 based on the SMPDB database.

LM: LPS+ML133; LG: LPS+Gramicidin; LK: LPS+KCl. Two-tailed unpaired Student's t-test. Source data are provided as a Source Data file.

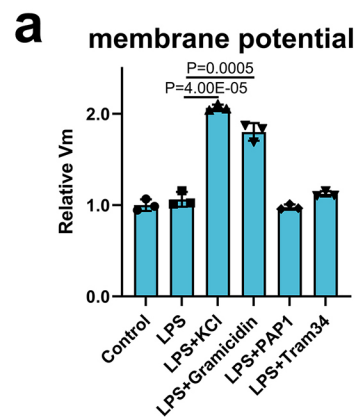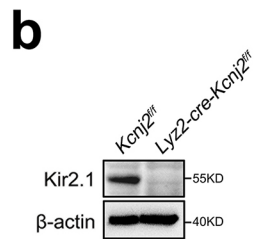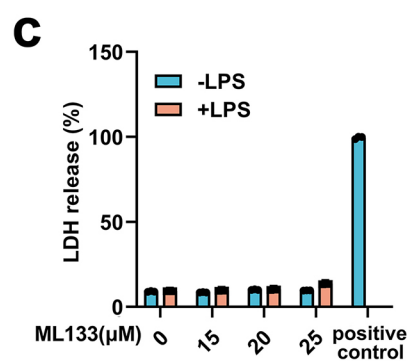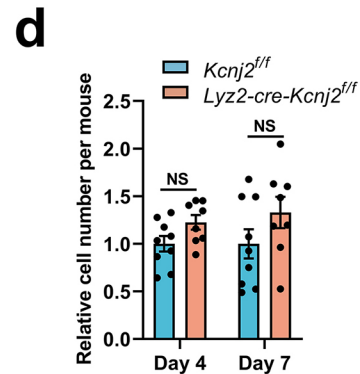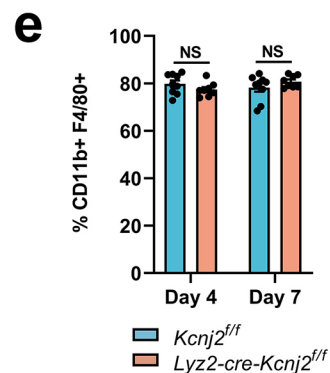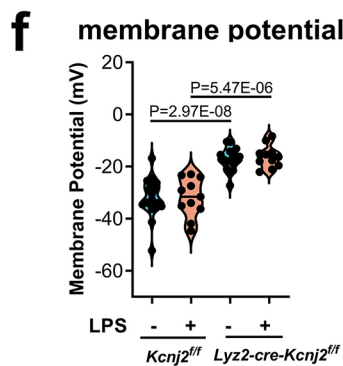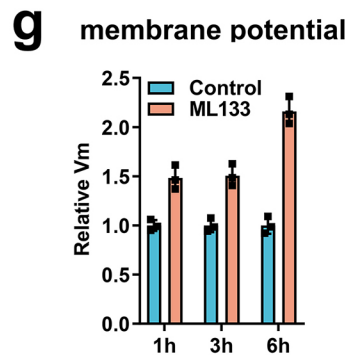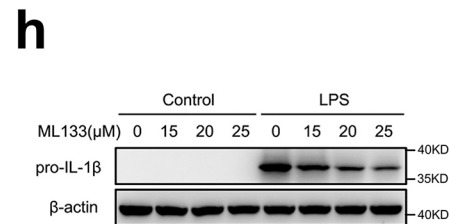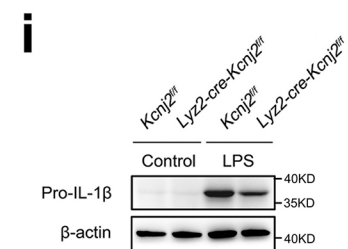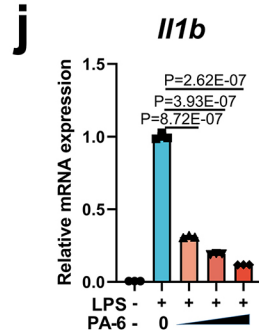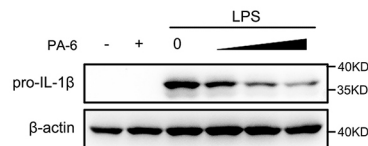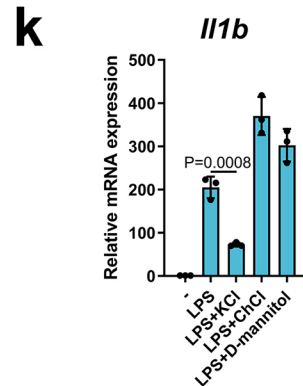

## Supplementary Figure 2. Kir2.1 is a critical regulator of macrophage $V_m$ driving inflammation

(a)  $V_m$  assessment of mouse peritoneal macrophages with the  $V_m$ -sensitive fluorochrome DiBAC4(3). Macrophages were treated with or without 500 ng/ml LPS for 1 h in the presence or absence of elevated  $[K^+]_e$  (50 mM), gramicidin (1.25  $\mu$ M), PAP1 (1  $\mu$ M), or Tram34 (1  $\mu$ M) (n=3, mean  $\pm$  SD). Representative of three independent experiments.

(b) Western blot analysis of Kir2.1 in control and *Lyz2-cre-Kcnj2<sup>ff</sup>* mouse peritoneal macrophages.

(c) LDH in the culture medium of mouse peritoneal macrophages treated with 500 ng/ml LPS in the presence or absence of different concentrations of ML133 for 6 h (n=3, mean  $\pm$  SD). Representative of three independent experiments.

(d and e) Percentages and numbers of BMDMs on days 4 and 7 after *ex vivo* differentiation from bone marrow cells from control and *Lyz2-cre-Kcnj2<sup>ff</sup>* mice. For each mouse, bone marrow cells were flushed from tibias and femurs with cold DMEM, then cultured in 6-well plate with 1/10 of the cells in each well (2 wells were used for further detection in day 4 and day 7) in complete DMEM medium supplemented 10 ng/ml macrophage colony-stimulating factor (PeproTech) to generate BMDMs. In day 4 and 7, cells were harvested and the number and percentage of macrophages (CD11b<sup>+</sup> F4/80<sup>+</sup>) were analyzed by FACS (data are normalized as relative cell number/mouse (control, n = 9; *Lyz2-cre-Kcnj2<sup>ff</sup>*, n = 8; mean  $\pm$  SEM). The gating strategy for FACS were shown in supplementary figure 7.

(f) Statistics  $V_m$  recorded at 30 s after initiation of recording (*Kcnj2<sup>ff</sup>*, n = 20 and 11, respectively; *Lyz2-cre-Kcnj2<sup>ff</sup>*, n = 16 and 11, respectively; mean  $\pm$  SEM)

(g)  $V_m$  assessment using the  $V_m$ -sensitive fluorochrome DiBAC4(3) in mouse peritoneal macrophages treated with or without 500 ng/ml LPS for 1, 3, or 6 h in the presence or absence of 25  $\mu$ M ML133 (n=3, mean  $\pm$  SD). Representative of three independent experiments.

(h) Western blots of pro-IL-1 $\beta$  expression in mouse peritoneal macrophages treated with 500 ng/ml LPS in the presence or absence of 25  $\mu$ M ML133 for 6 h.

(i) Western blots of pro-IL-1 $\beta$  expression in lysed mouse peritoneal macrophages from control and *Lyz2-cre-Kcnj2<sup>ff</sup>* mice treated with 500 ng/ml LPS for 6 h.

(j) qPCR of IL-1 $\beta$  mRNA transcription and Western blots of pro-IL-1 $\beta$  expression in mouse peritoneal macrophages treated with 500 ng/ml LPS for 6 h in the presence or absence of PA-6. (n=3, mean  $\pm$  SD).

(k) qPCR analysis of IL-1 $\beta$  mRNA transcription levels of mouse peritoneal macrophages treated with 500 ng/ml LPS in the presence of elevated  $[K^+]_e$  (50 mM), choline chloride (50 mM), or D-mannitol (50 mM) for 6 h (n=3,

mean  $\pm$  SD).

Two-tailed unpaired Student's t-test. The qPCR and western blot data are representative of three independent experiments. Source data are provided as a Source Data file.

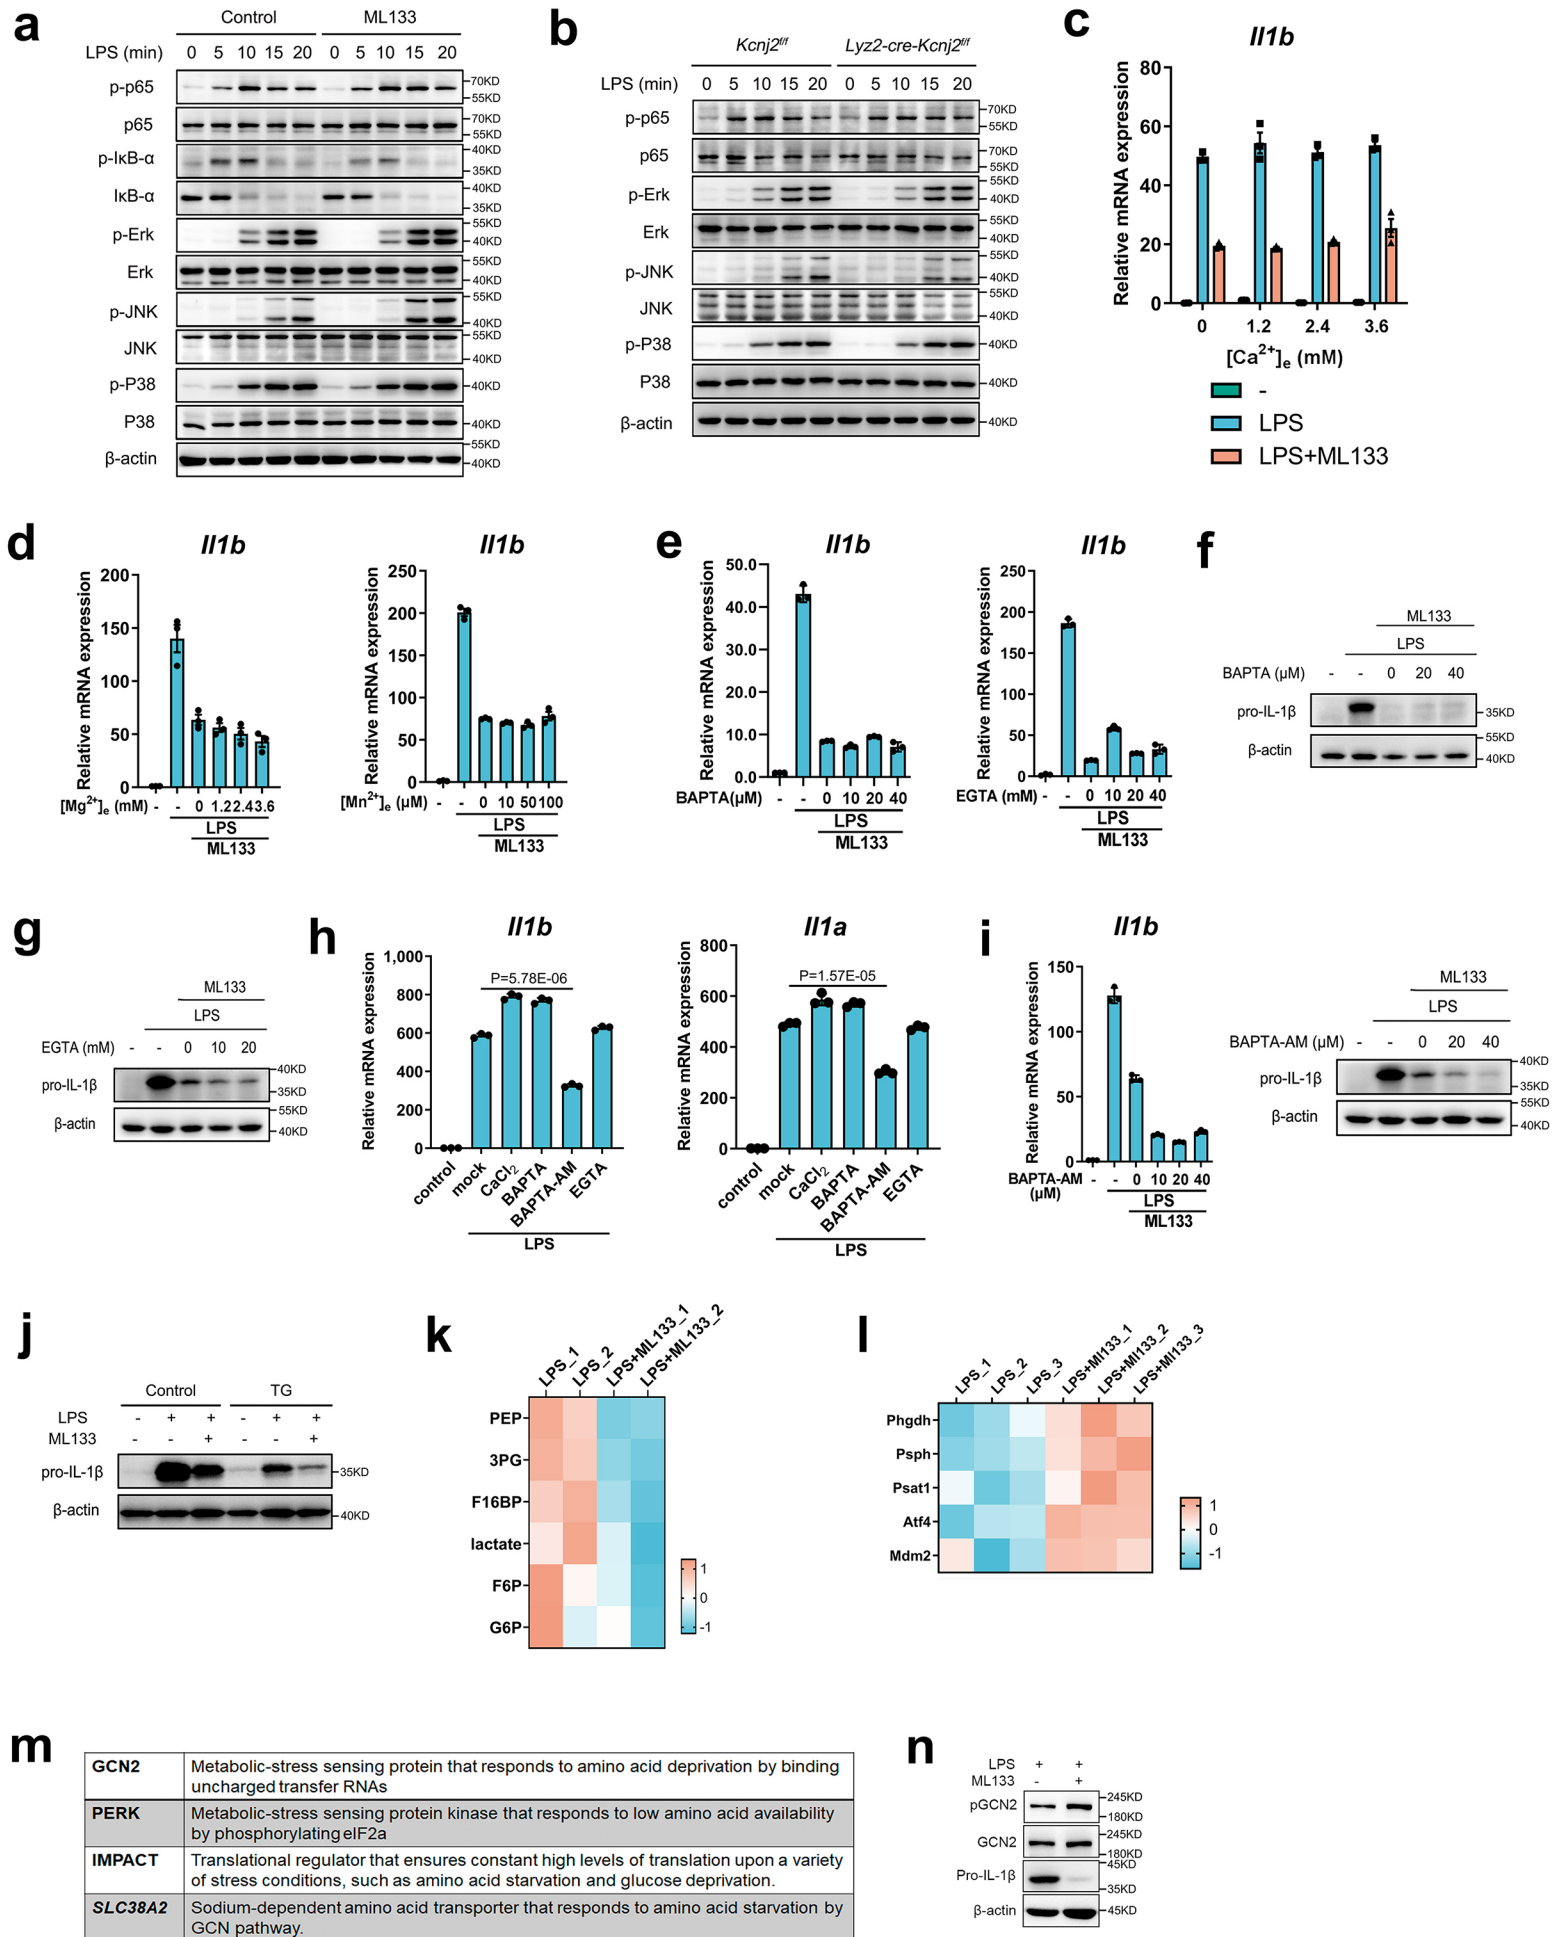

### **Supplementary Figure 3. Kir2.1-mediated $V_m$ endows macrophages with the metabolic signature of inflammation**

(a and b) Activation of TLR4-mediated downstream signaling pathways in 500 ng/ml LPS-treated peritoneal macrophages in the presence or absence of ML133 (25  $\mu$ M).

(c and d) qPCR analysis of IL-1 $\beta$  mRNA transcription levels in mouse peritoneal macrophages treated with 500 ng/ml LPS and 25  $\mu$ M ML133 in the presence of different concentrations of extracellular Ca<sup>2+</sup> (c), Mg<sup>2+</sup> and Mn<sup>2+</sup> (d) for 6 h (c, n=3; d, n=3; mean  $\pm$  SD).

(e to i) IL-1 $\beta$  mRNA (e, h, and i), IL-1 $\alpha$  and TNF- $\alpha$  (h) transcription, and pro-IL-1 $\beta$  protein expression levels (f, g and i) of mouse peritoneal macrophages stimulated by 500 ng/ml LPS with 25  $\mu$ M ML133 in the presence of BAPTA (e and f), EGTA (e and g), and BAPTA-AM (i) for 6 h followed. (h) qPCR analysis of macrophages stimulated by 500 ng/ml LPS in the presence of CaCl<sub>2</sub> (2 mM), BAPTA (20  $\mu$ M), BAPTA-AM (20  $\mu$ M), and EGTA (10 mM) for 6 h. (e, n=3; h, n=3; i, n=3; mean  $\pm$  SD).

(j) Western blots of pro-IL-1 $\beta$  protein expression levels of mouse peritoneal macrophages treated with 500 ng/ml LPS and 25  $\mu$ M ML133 in the presence or absence of 1  $\mu$ M thapsigargin (TG) as indicated for 6 h.

(k) Metabolites of glycolysis identified in targeted metabolomics. Mouse peritoneal macrophages were treated with 500 ng/ml LPS in the presence or absence of ML133 (25  $\mu$ M) for 6 h, then cell metabolites were extracted and analyzed by LC-MS (n = 2).

(l) Heatmap of RNA-seq analysis of enzyme genes and master regulators for the SSP in BMDMs treated with 500 ng/ml LPS in the presence or absence of ML133 (25  $\mu$ M) for 6 h (n = 3).

(m) Brief descriptions of the four overlapped genes upregulated by both ML133 (25  $\mu$ M) and Kir2.1 genetic-deficient macrophages.

(n) Western blot analysis of GCN2 activation of mouse peritoneal macrophages treated with LPS in the presence or absence of ML133 (25  $\mu$ M) for 6 h.

Two-tailed unpaired Student's t-test. The qPCR and western blot data are representative of three independent experiments. Source data are provided as a Source Data file.



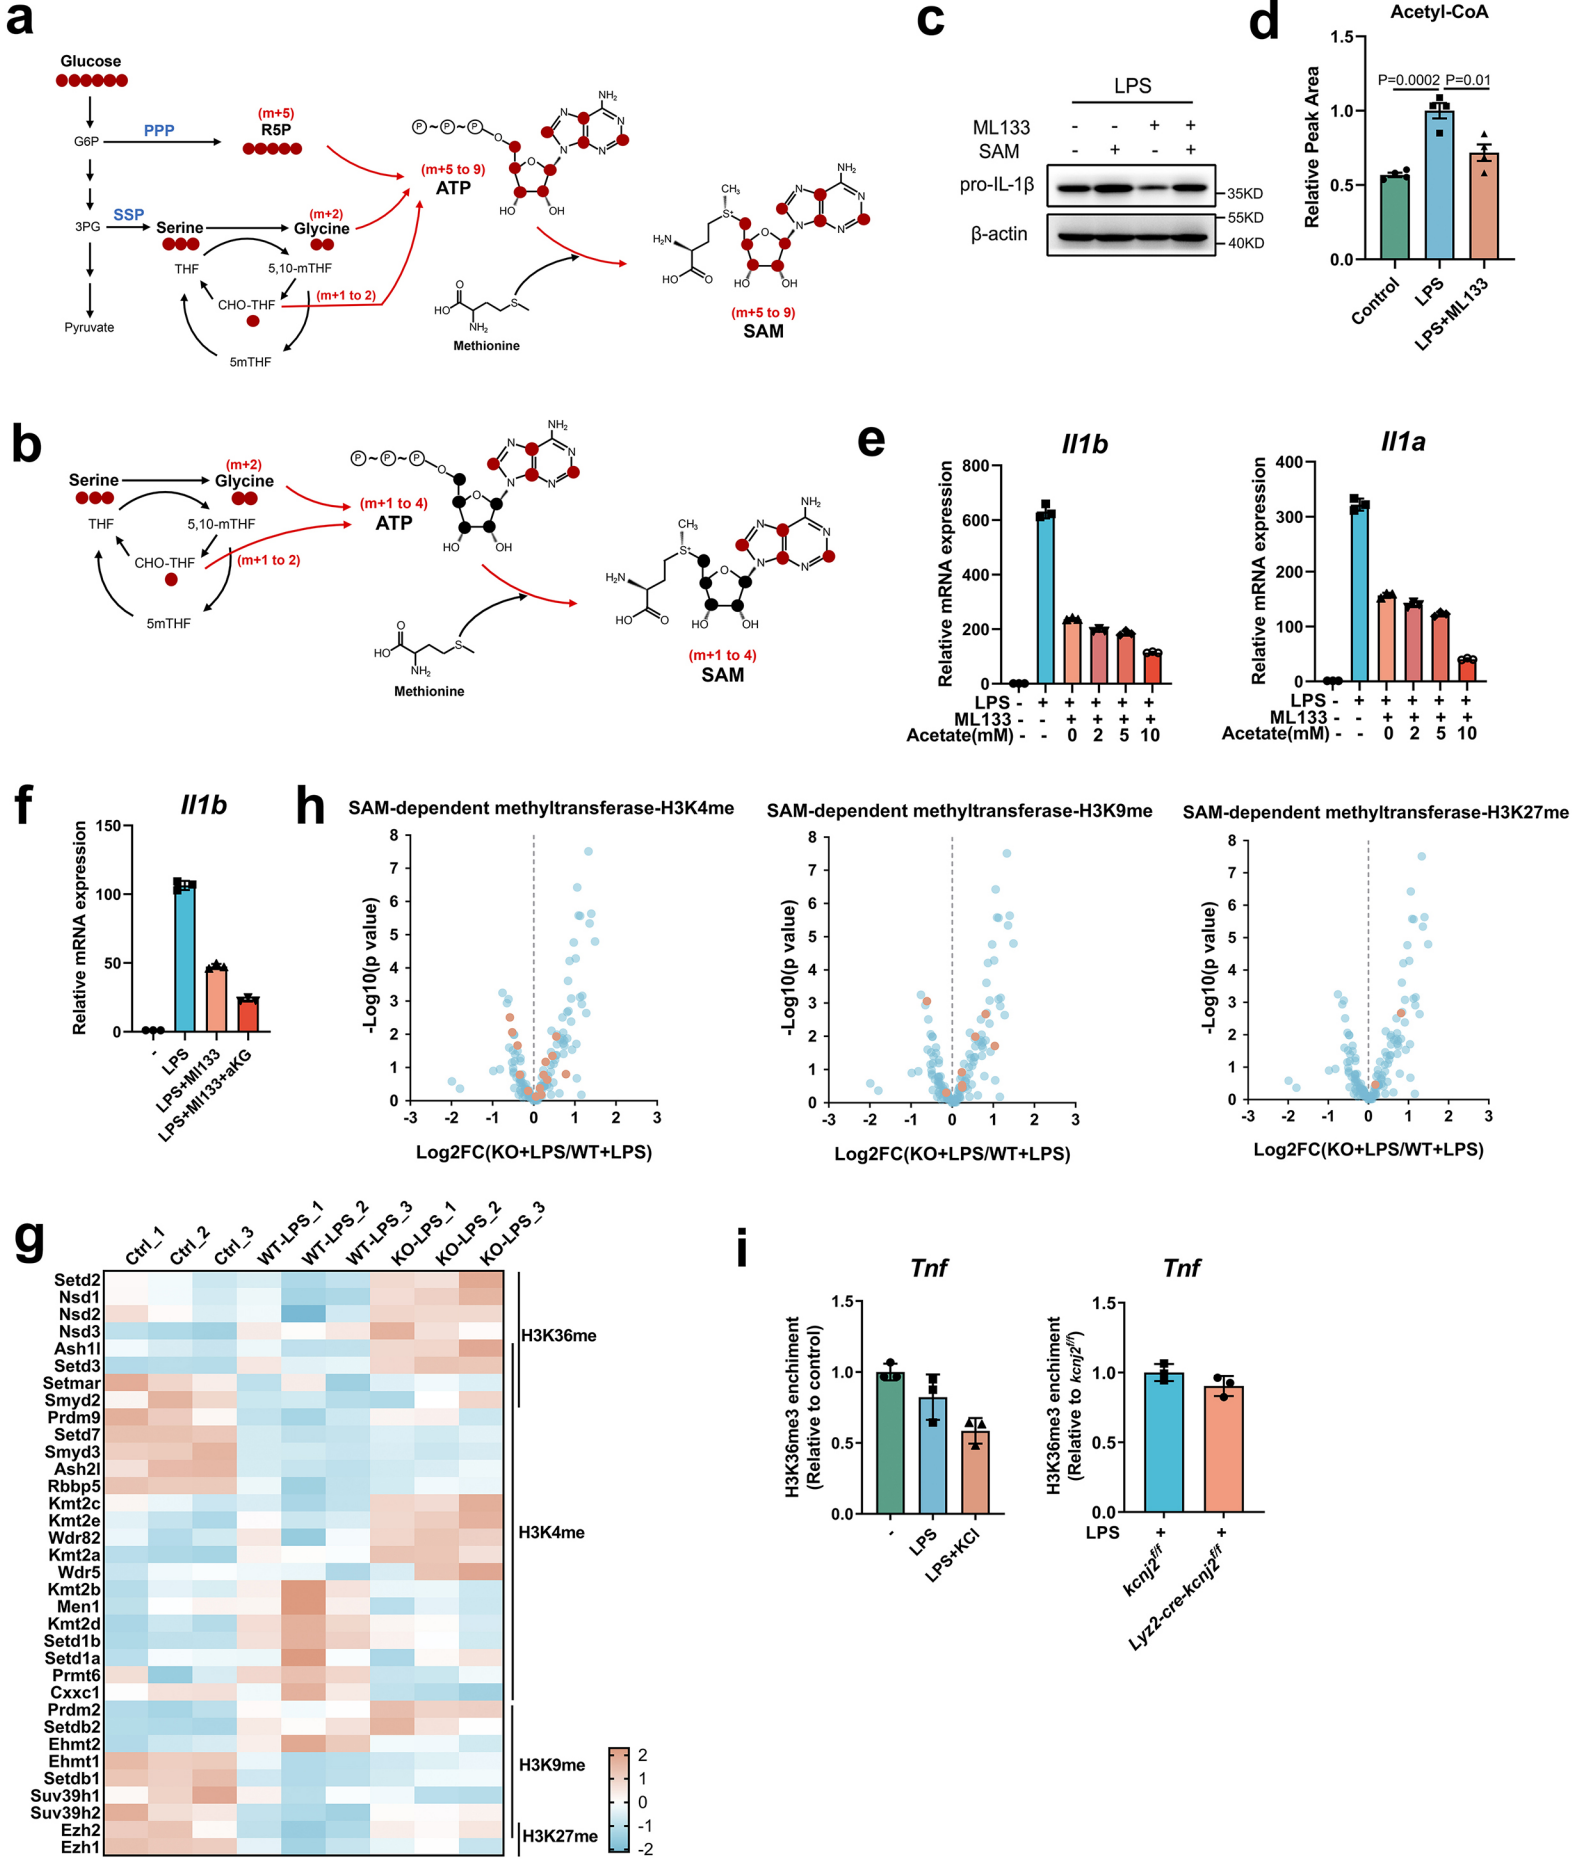

**Supplementary Figure 4. Kir2.1-mediated  $V_m$  supports nutrient uptake for SAM generation to induce a metabolism-responsive inflammatory program**

(a and b) Schematic of derivation and contribution of glucose-derived (a) and serine-derived (b) carbon atoms to SAM synthesis.

(c) Western blots of pro-IL-1 $\beta$  protein expression in mouse peritoneal macrophages treated with 500 ng/ml LPS for 6 h in the presence of ML133 (25  $\mu$ M) with or without SAM.

(d) Relative Acetyl-CoA levels analyzed by unbiased metabolomics. (c, n=4; mean  $\pm$  SEM).

(e) qPCR analysis of IL-1 $\beta$  and IL-1 $\alpha$  mRNA transcription levels in peritoneal macrophages treated with 500 ng/ml LPS for 6 h in the presence or absence of ML133 (25  $\mu$ M) and different concentrations of acetate (n=3, mean  $\pm$  SD).

(f) qPCR analysis of IL-1 $\beta$  mRNA transcription levels in peritoneal macrophages treated with 500 ng/ml LPS for 6 h in the presence or absence of ML133 (25  $\mu$ M) and  $\alpha$ -KG (n=3, mean  $\pm$  SD).

(g and h) Heatmap (g) and Volcano plot (h) analysis of gene expression of SAM-dependent methyltransferase by RNA-seq in BMDMs treated with 500 ng/ml LPS for 6 h. The expression levels of methyltransferase genes (highlighted in h) (Wagner and Carpenter, 2012) among 183 annotated SAM-dependent methyltransferase genes (Kottakis et al., 2016) were analyzed.

(i) ChIP-qPCR analysis of H3K36me3 enrichment in the *Tnf* gene in mouse peritoneal macrophages from control and *Lyz2-cre-Kcnj2<sup>fl/fl</sup>* mice treated with 500 ng/ml LPS in the presence or absence of ML133 (25  $\mu$ M) for 6 h (n=3, mean  $\pm$  SD).

Two-tailed unpaired Student's t-test. The qPCR and western blot data are representative of three independent experiments. Source data are provided as a Source Data file.

**a**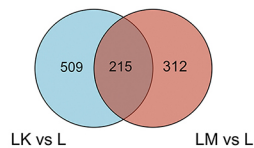**b**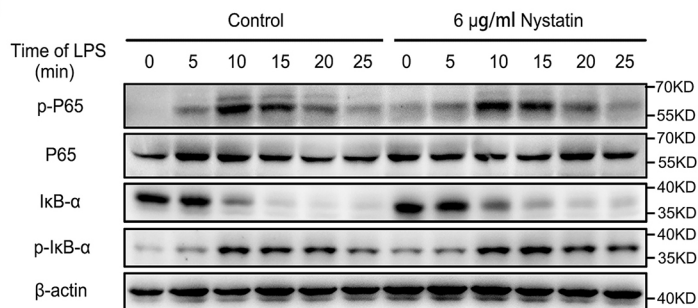**c**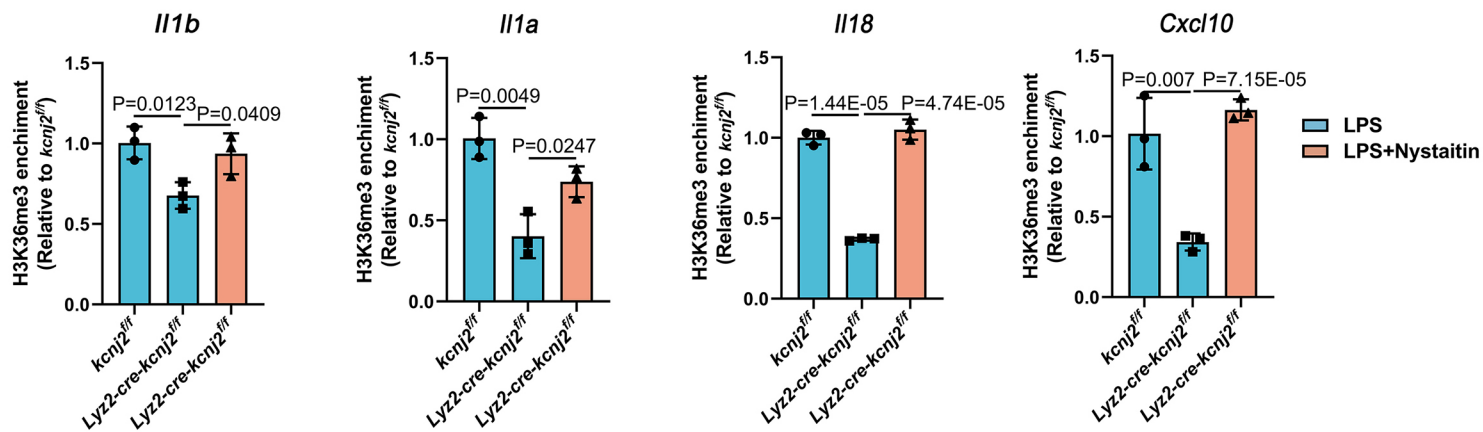**d**

### Plasma membrane PI(4,5)P<sub>2</sub> assay

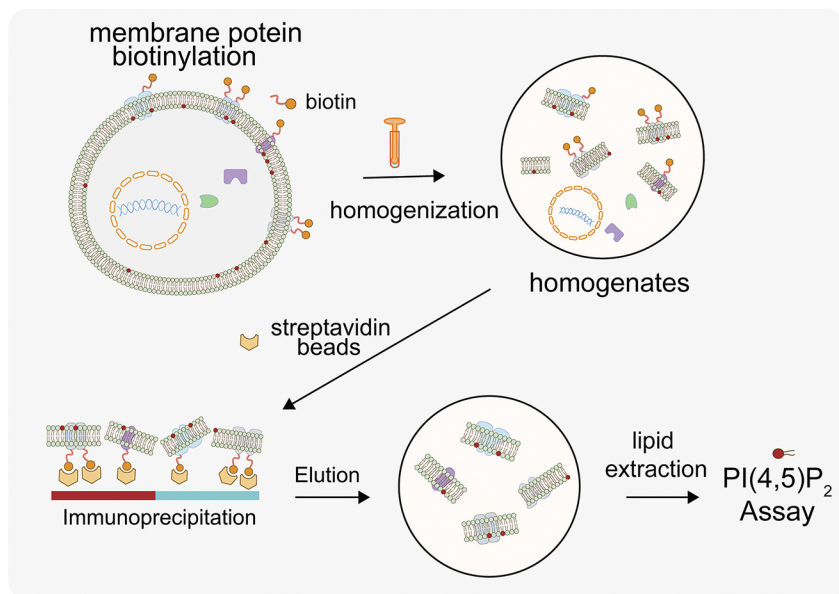**e**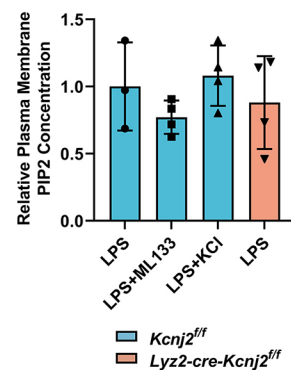

**Supplementary Figure 5. Kir2.1-mediated  $V_m$  drives nutrient uptake by retaining nutrient transporters on the macrophage cell surface**

(a) Venn diagram of overlapped differential membrane protein analysis by MS. LM: LPS+ML133; LK: LPS+KCl.

(b) Activation of TLR4-mediated downstream signaling pathways in peritoneal macrophages treated with 500 ng/ml LPS in the presence or absence of 6  $\mu$ g/ml Nystatin.

(c) ChIP-qPCR analysis of H3K36me3 enrichment in the *Il1a*, *Il1b*, *Il18*, and *Cxcl10* genes in mouse peritoneal macrophages from control and *Lyz2-cre-Kcnj2<sup>fl/fl</sup>* mice treated with 500 ng/ml LPS in the presence or absence of 6  $\mu$ g/ml nystatin for 6 h (n=3, mean  $\pm$  SD).

(d and e) Schematic diagram of plasma membrane lipid extraction for PI(4,5)P2 ELISA analysis (d) and the relative amount of plasma membrane PI(4,5)P2 (e). (n=3, 4, 4, 4 respectively; mean  $\pm$  SD).

Two-tailed unpaired Student's t-test. The ChIP-qPCR and western blot data are representative of three independent experiments. Source data are provided as a Source Data file.

**a**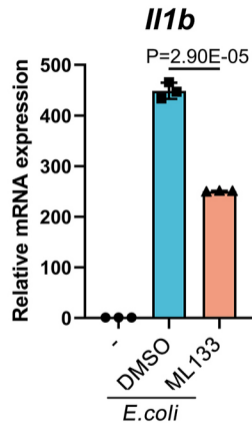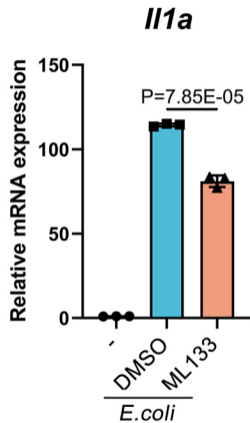**b**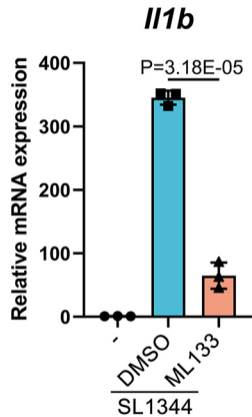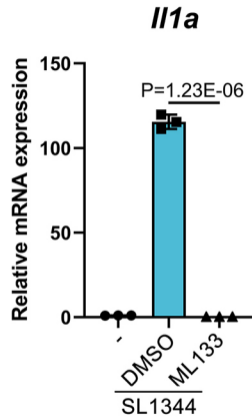

**Supplementary Figure 6. Kir2.1 repression alleviates inflammation triggered by pathogenic or danger signals in mouse models and human samples**

(a and b) qPCR analysis of IL-1 $\beta$  and IL-1 $\alpha$  mRNA transcription levels in peritoneal macrophages infected with *E. coli* or *salmonella SL1344* for 6 h in the presence or absence of ML133 (25  $\mu$ M) (n=3, mean  $\pm$  SD).

Two-tailed unpaired Student's t-test. Representative of three independent experiments. Source data are provided as a Source Data file.

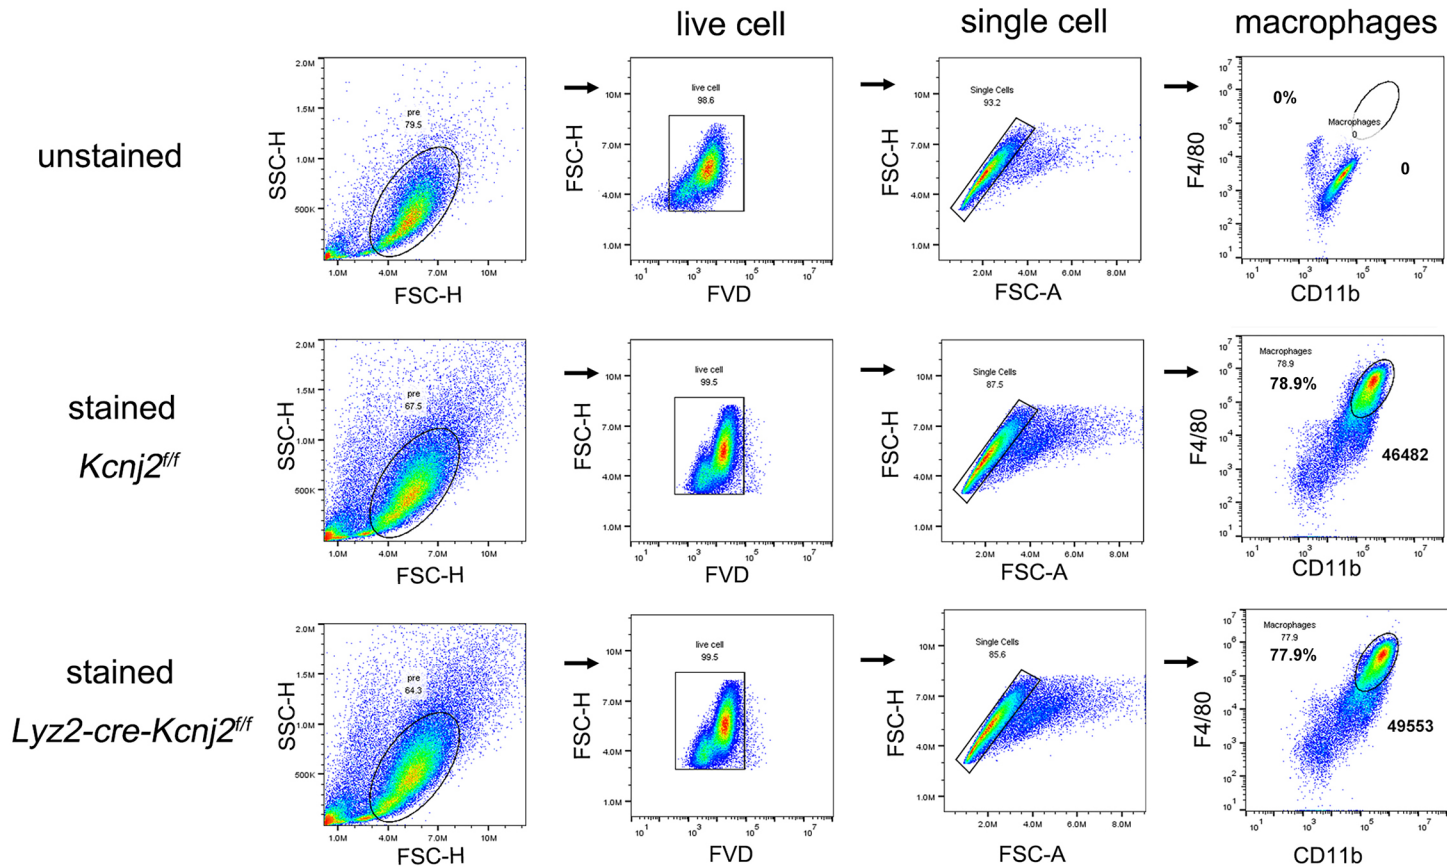

**Supplementary Figure 7. Gating strategy for FACS in supplemental figure 2d and 2e.**

Shown above is the representative gating strategy for FACS of macrophages differentiation in supplementary figure 2d and 2e.



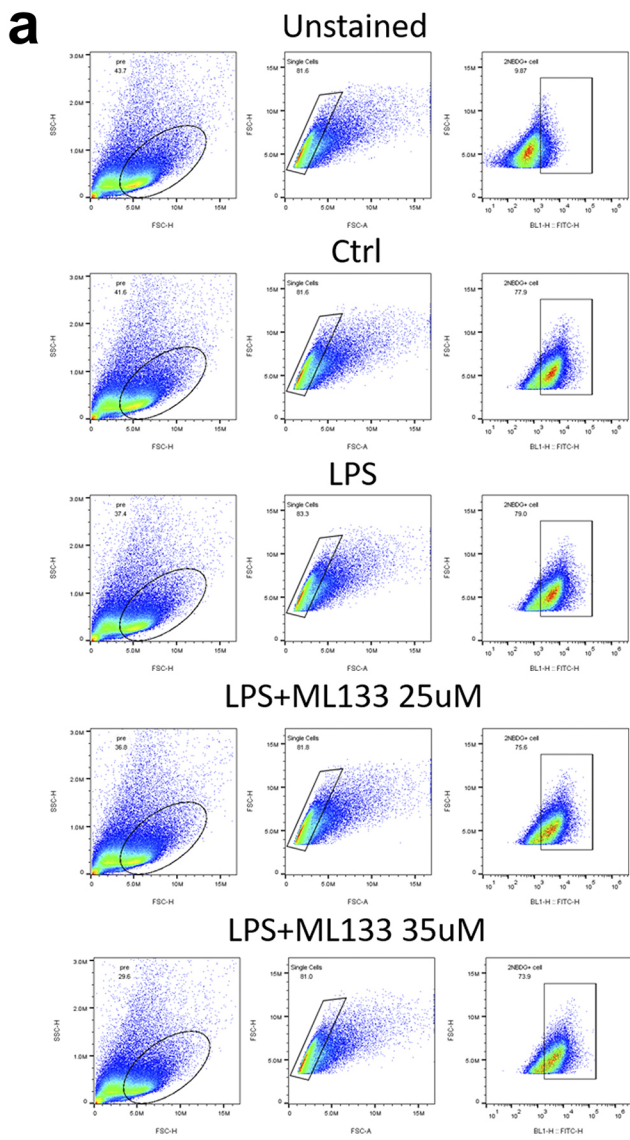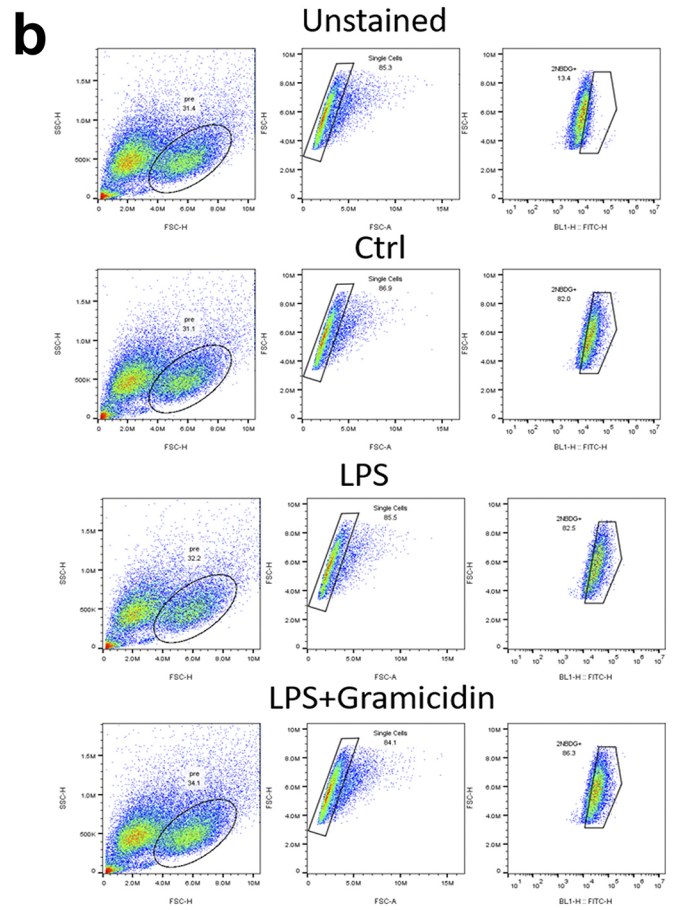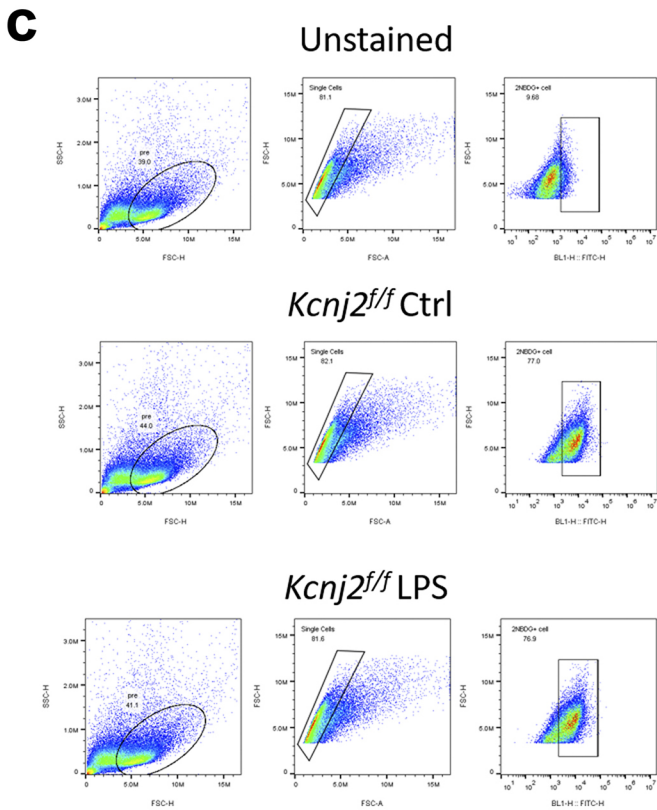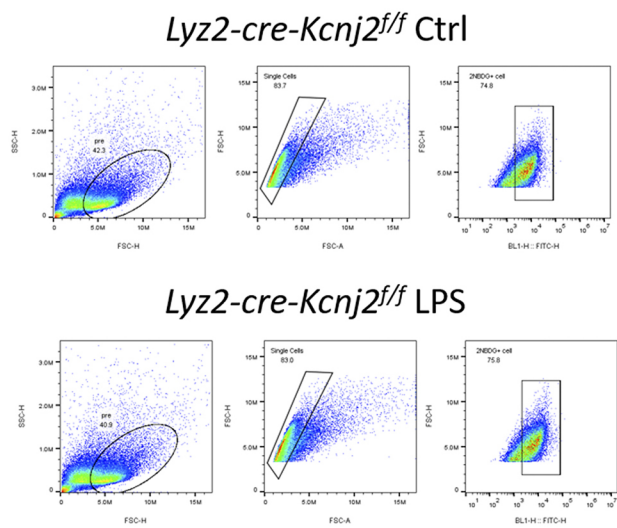

**Supplementary Figure 8. Gating strategy for FACS in figure 3f.**  
Shown above is the representative gating strategy for FACS of *in vitro* glucose uptake in macrophages in figure 3f.

**a**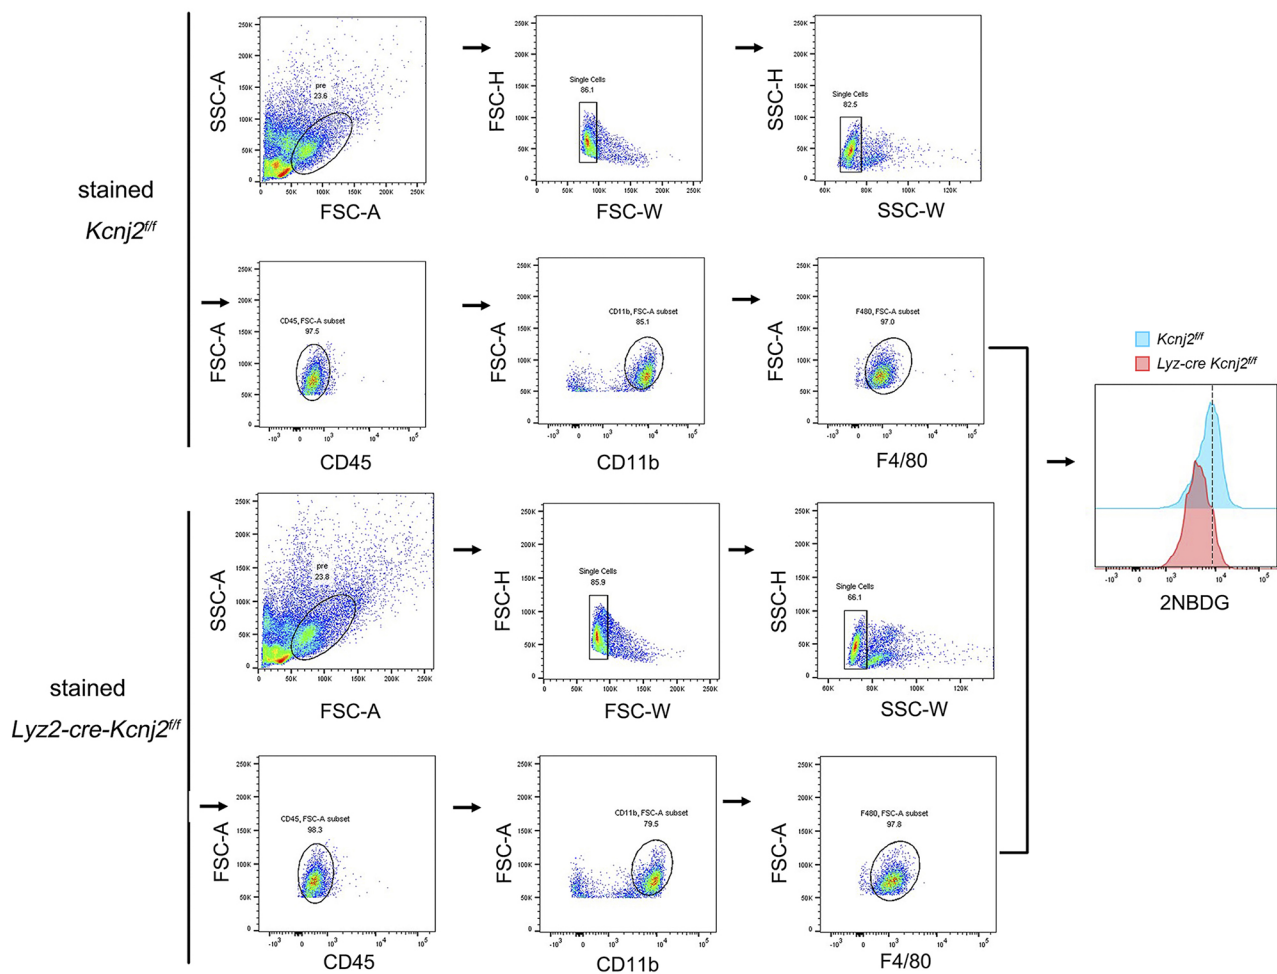**b**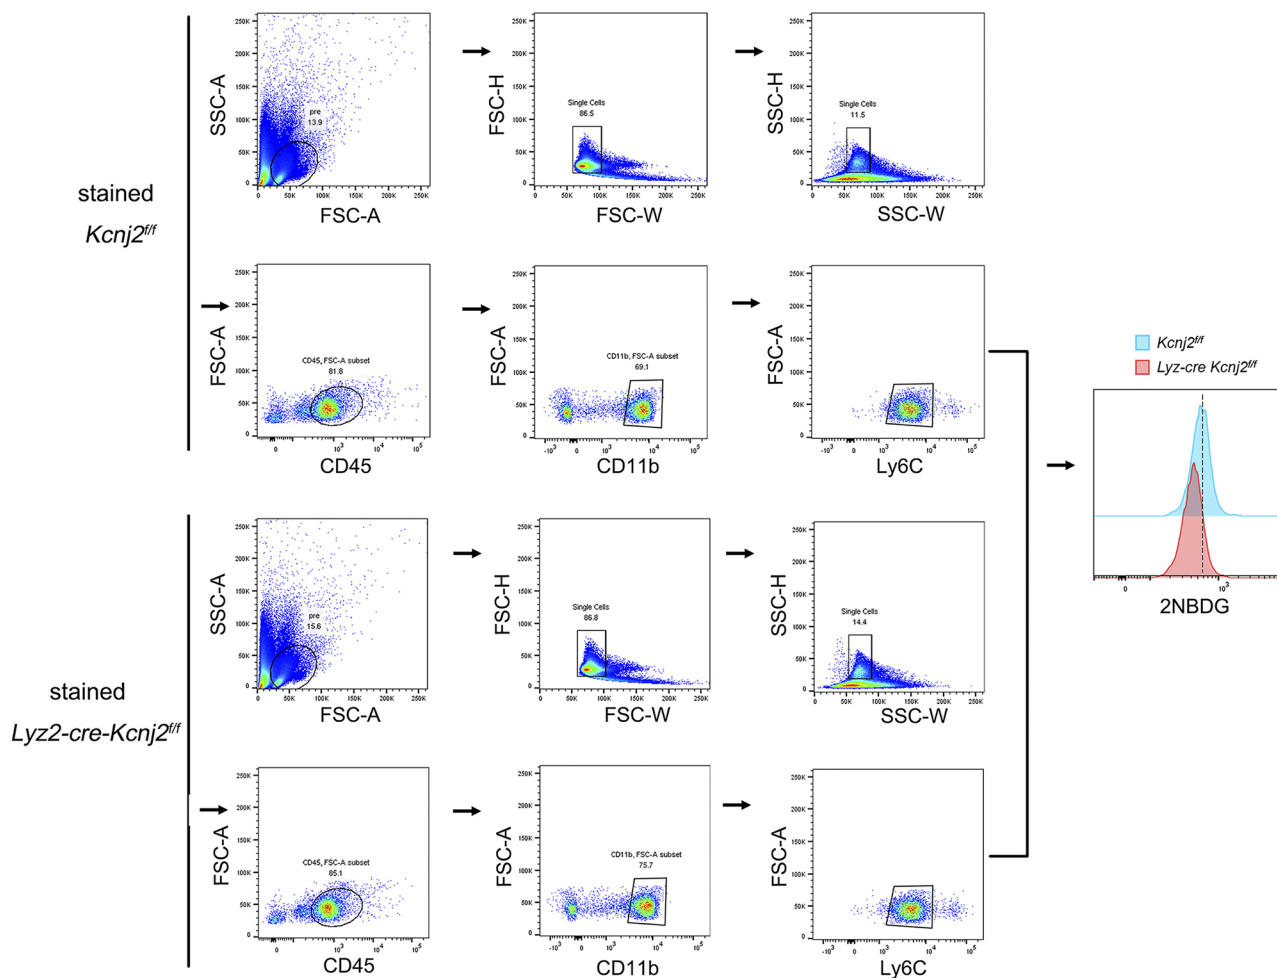

**Supplementary Figure 9.** Gating strategy for FACS in figure 3g. Shown above is the representative gating strategy for FACS of *in vivo* glucose uptake in macrophages in figure 3g. a, gating strategy for macrophages in PEC; b, gating strategy for monocytes in PBMCs.

**a**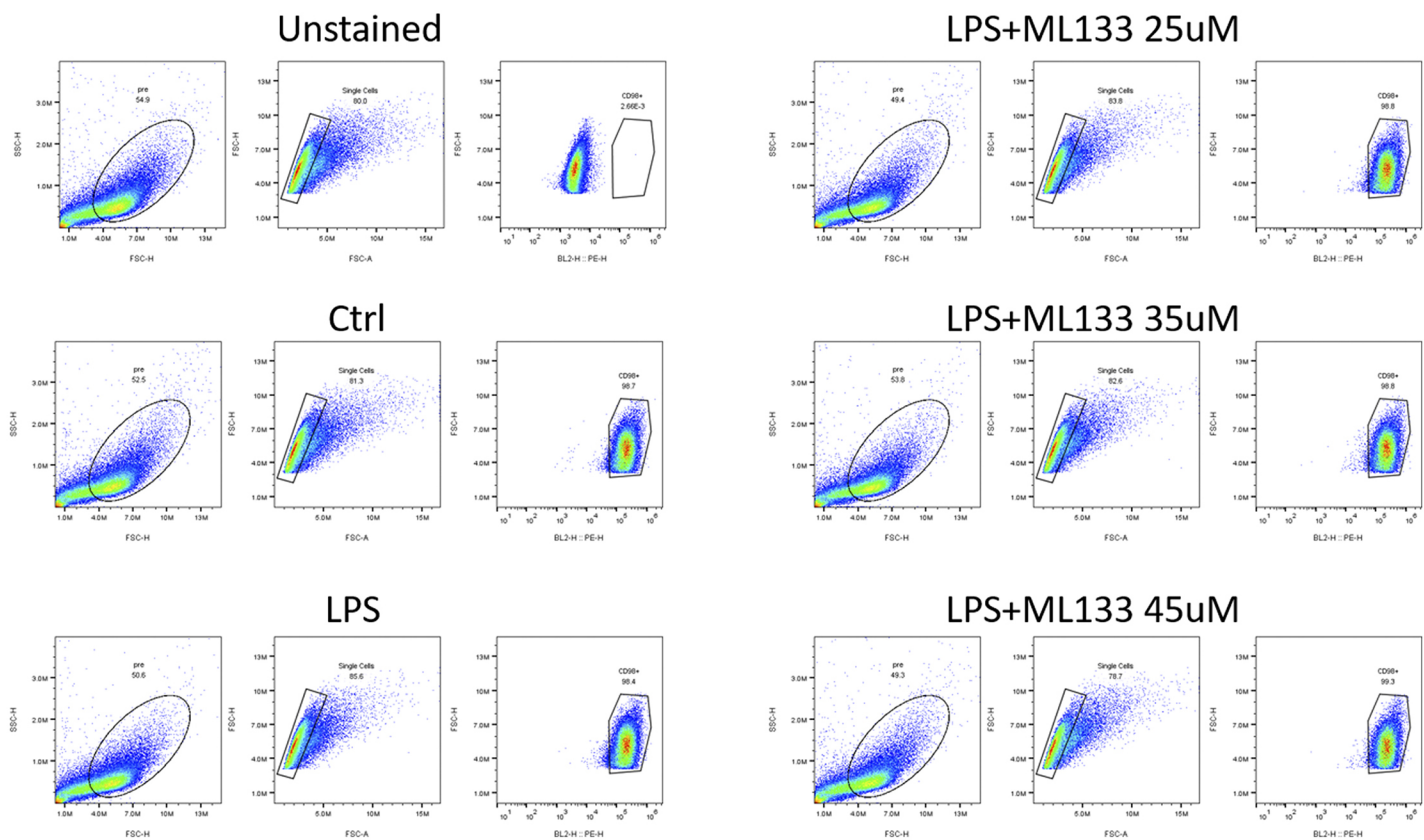**b**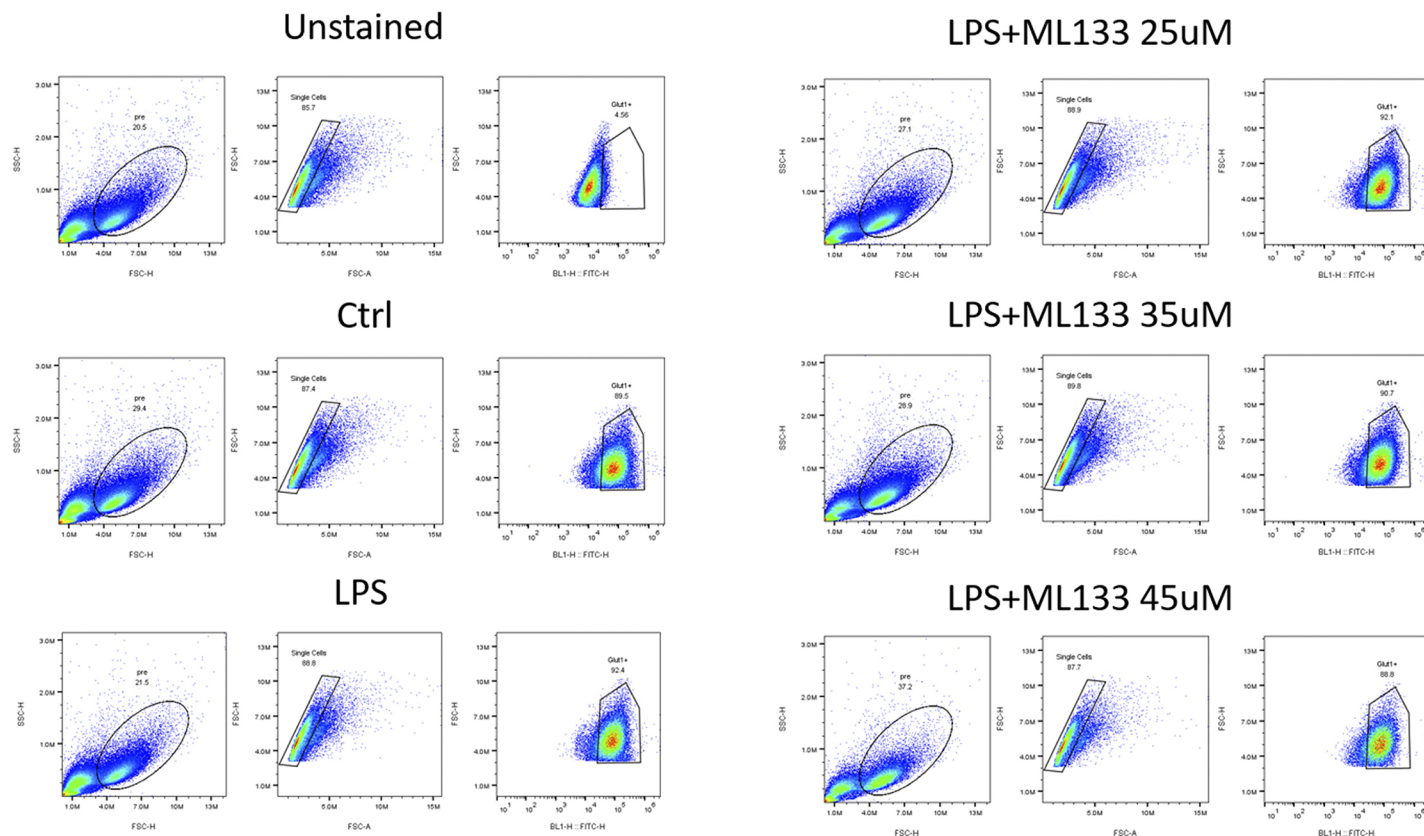

**Supplementary Figure 10.** gating strategy for FACS in figure 5f, 5g and 5h.

Shown above is the representative gating strategy for FACS of membrane 4F2hc (a) and Glut1 (b) in macrophages in figure 5f, 5g and 5h.

## Normal

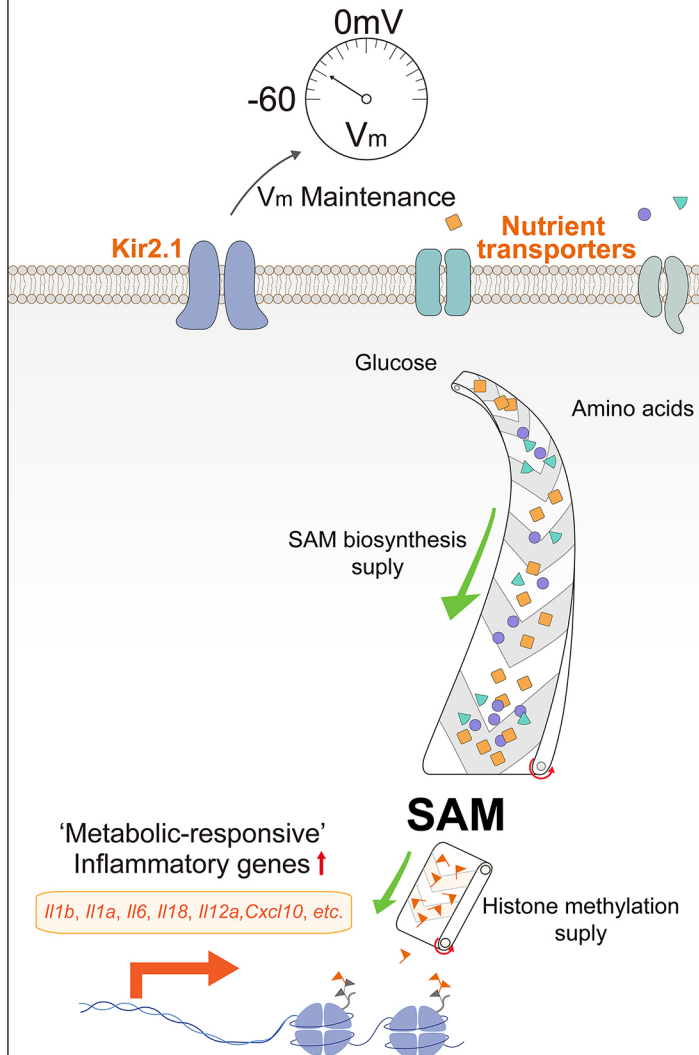

## V<sub>m</sub> Depolarization

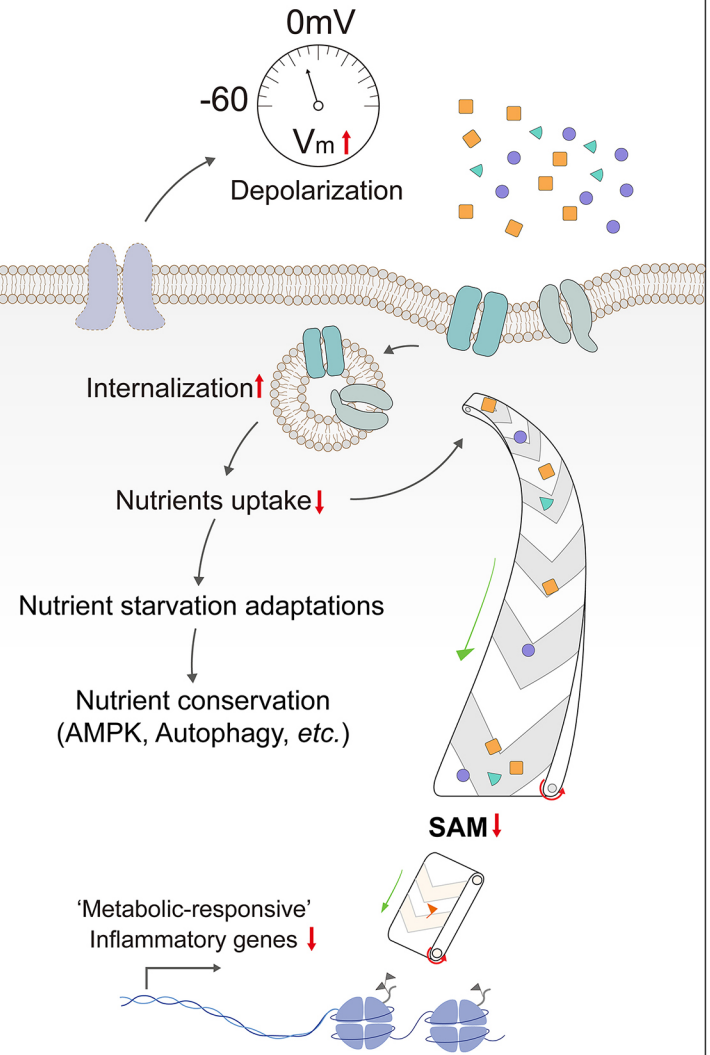

**Supplementary Figure 11. Kir2.1-mediated macrophage  $V_m$  is a critical determinant of nutrient acquisition to feed the metabolic underpinnings of inflammation**
